# Supplementary material
Source: PubMed Central journal article supplement (PMC9542352)
Supplement: NIHMS1837454-supplement-11.pdf [file NIHMS1837454-supplement-11.pdf]

**Table S4. Formula per liter of BYEM10 broth. Related to STAR Methods and to Figure S5A-B, S5D-E, S6A-C, and S6F.**

---

|                                                                                     |         |
|-------------------------------------------------------------------------------------|---------|
| KH <sub>2</sub> PO <sub>4</sub> (P5655, Sigma-Aldrich)                              | 0.06 g  |
| K <sub>2</sub> HPO <sub>4</sub> (RES20765, Sigma-Aldrich)                           | 0.06 g  |
| (NH <sub>4</sub> ) <sub>2</sub> SO <sub>4</sub> (221260, Sigma-Aldrich)             | 0.06 g  |
| NaCl (S3014, Sigma-Aldrich)                                                         | 0.12 g  |
| MgSO <sub>4</sub> (230391, Sigma-Aldrich)                                           | 0.025 g |
| CaCl <sub>2</sub> (746495, Sigma-Aldrich)                                           | 0.01 g  |
| Yeast Extract (DF0127-17-9, Fisher Scientific)                                      | 4.0 g   |
| Peptone from casein, pancreatic digest (70169, Sigma-Aldrich)                       | 0.5 g   |
| Meat extract (70164, Sigma-Aldrich)                                                 | 0.375 g |
| Brain Heart Infusion broth without dextrose (71-C00079, Microbiology International) | 26 g    |
| Hemin (51280, Sigma-Aldrich)                                                        | 0.01 g  |
| L-Cysteine (30120, Sigma-Aldrich)                                                   | 1 g     |
| Vitamin Supplement (MD-VS, ATCC)                                                    | 10 mL   |
| Mineral Supplement (MDTMS, ATCC)                                                    | 10 mL   |
| Vitamin K3 (M5625, Sigma)                                                           | 1 mg    |

---
