# Supplementary material
Source: PubMed Central journal article supplement (PMC9542352)

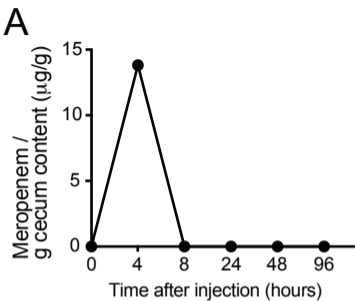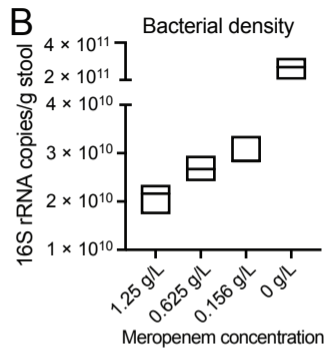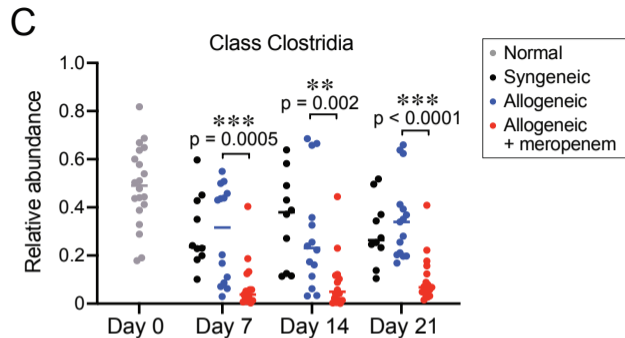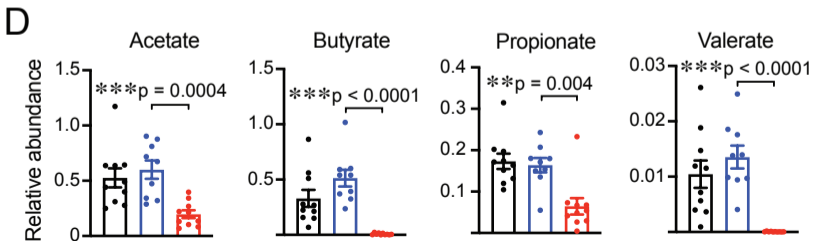

Supplement: NIHMS1837454-supplement-2.pdf [file NIHMS1837454-supplement-2.pdf]

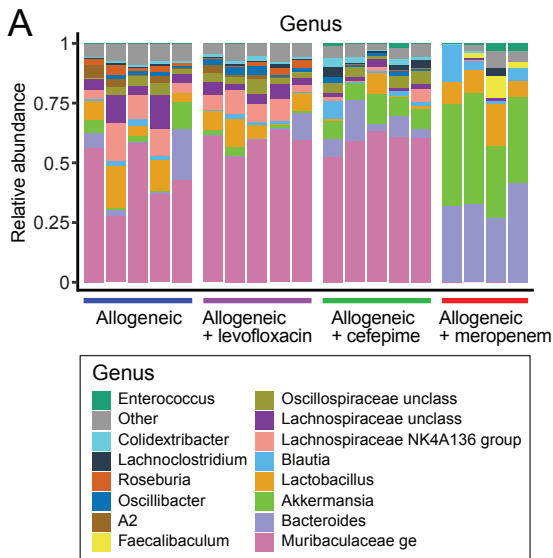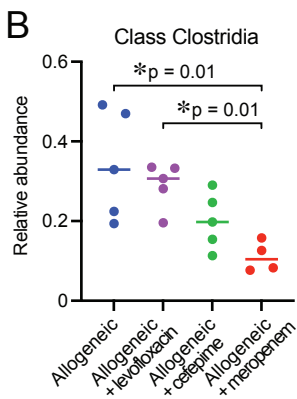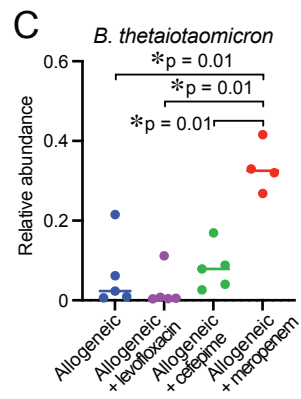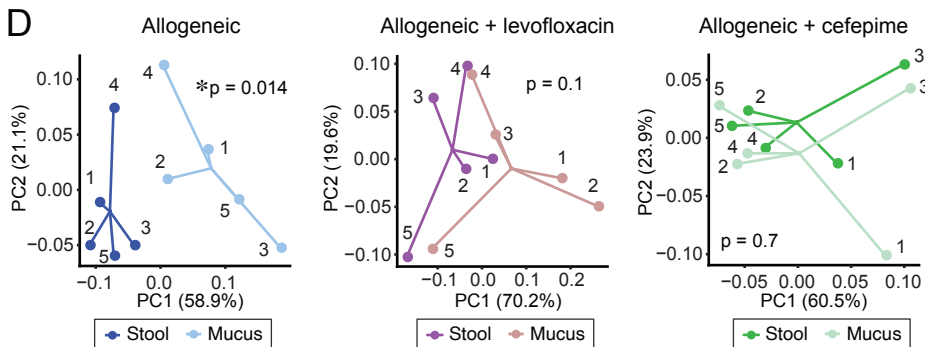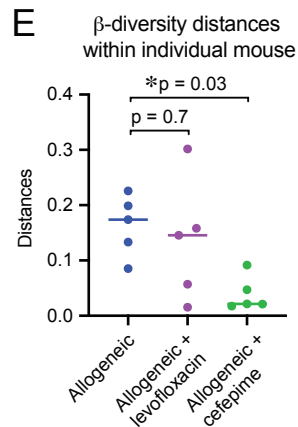

Supplement: NIHMS1837454-supplement-5.pdf [file NIHMS1837454-supplement-5.pdf]

**A**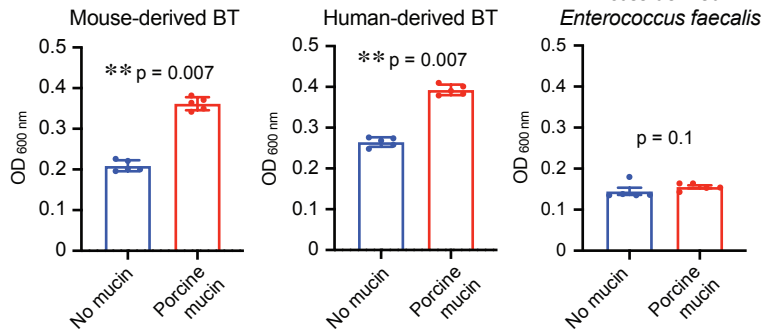**B**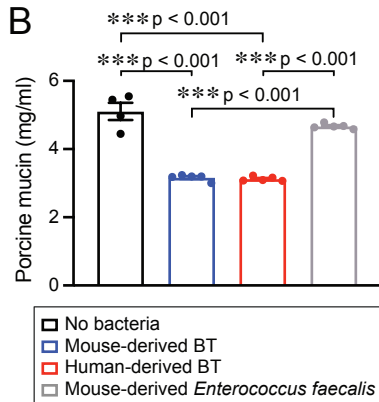**C**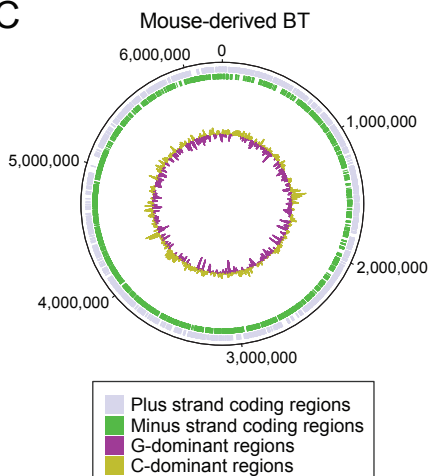**D**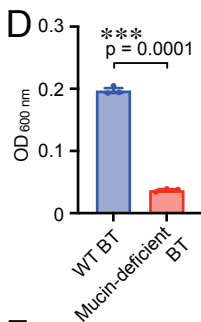**E**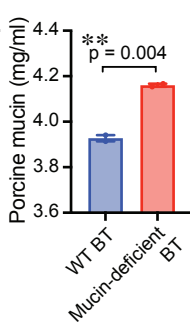**G**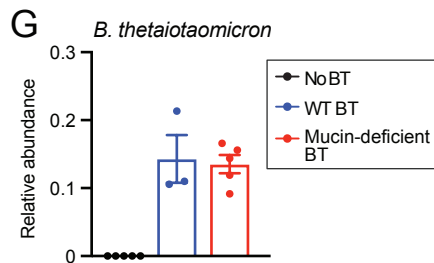**F**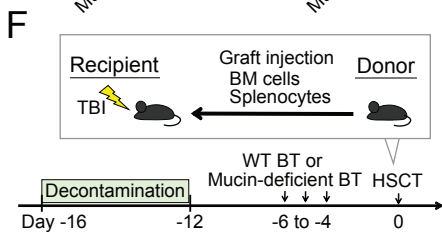**H**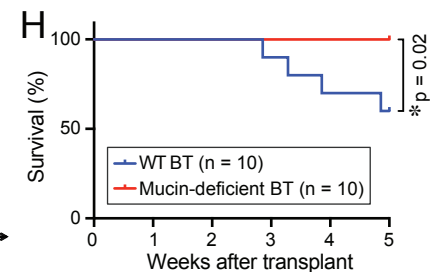

Supplement: NIHMS1837454-supplement-6.pdf [file NIHMS1837454-supplement-6.pdf]

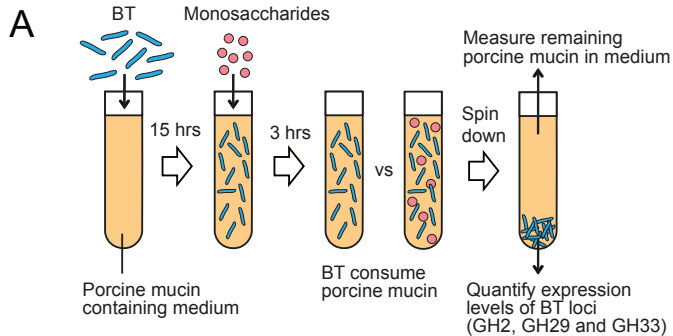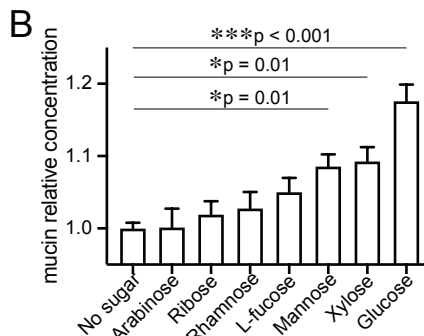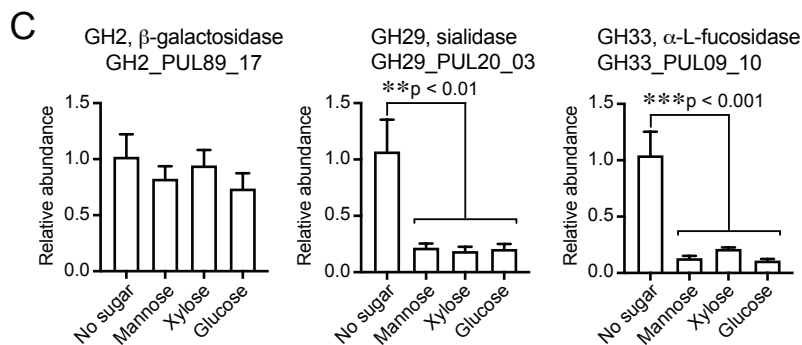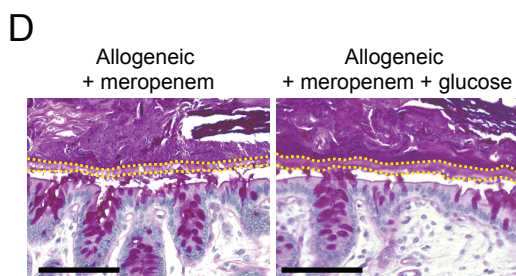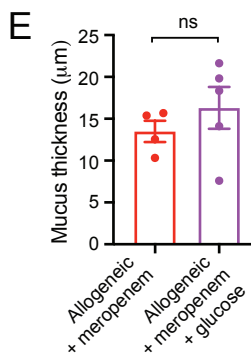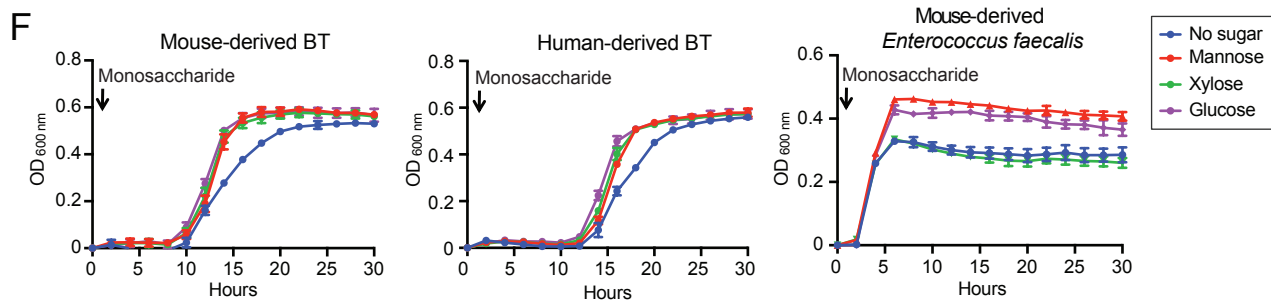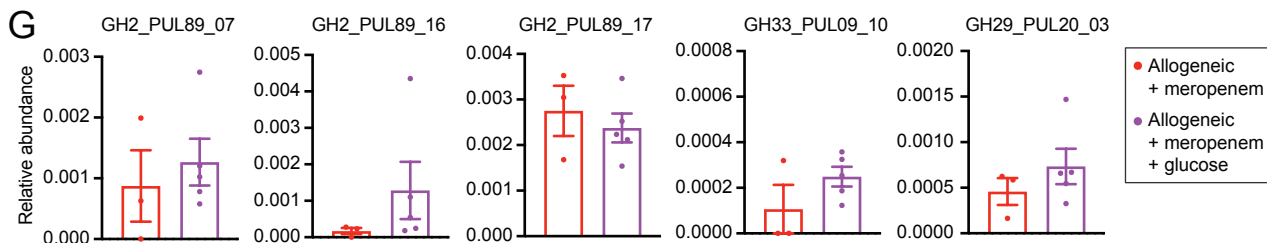

Supplement: NIHMS1837454-supplement-7.pdf [file NIHMS1837454-supplement-7.pdf]
